# Supplementary material for: Robust Identification of Noncoding RNA from Transcriptomes Requires Phylogenetically-Informed Sampling
Source: PLoS Comput Biol. 2014 Oct 30;10(10):e1003907. doi: 10.1371/journal.pcbi.1003907 (PMC4214555; doi:10.1371/journal.pcbi.1003907)
Supplement: Table S2 — Strain/species names, genome accessions, RNA-seq data sources, Pubmed IDs, sequencing platform and notes for each dataset used for this study. (XLS) [file pcbi.1003907.s002.xls]

## Sheet: Sheet1
Species	EMBL ID	Experimental ID	Source	PMID	Platform	Notes
Helicobacter pylori 26695	AE000511	SRP001481	http://www.ncbi.nlm.nih.gov/sra/?term=SRA010186	20164839	Illumina Genome Analyzer and Roche/454 GS FLX
Chlamydophila pneumoniae CWL029	AE001363	SRP004041	http://www.ncbi.nlm.nih.gov/sra/?term=SRA025890	21989159	Roche/454 GS-FLX
Vibrio_cholerae_O1_biovar_El_Tor_N16961	AE003852	SRP005635	http://www.ncbi.nlm.nih.gov/sra/?term=SRA029822	21843873	Illumina HiSeq 2000
	AE003853	SRP005635	http://www.ncbi.nlm.nih.gov/sra/?term=SRA029822	21843873	Illumina Genome Analyzer II
Pseudomonas aeruginosa PAO1	AE004091	SRP013960	http://trace.ncbi.nlm.nih.gov/Traces/sra/?study=SRP013960	22590564	Illumina Genome Analyzer II
Sulfolobus solfataricus P2	AE006641	SRP001461	http://www.ncbi.nlm.nih.gov/sra/?term=SRA010164	19884261	Illumina Genome Analyzer
Xanthomonas axonopodis pv. citri str. 306	AE008923	SRP013943	http://www.ncbi.nlm.nih.gov/sra/?term=SRA052842	23153100	Illumina Genome Analyzer IIx
Pyrococcus furiosus DSM 3638	AE009950	SRX103303	http://www.ncbi.nlm.nih.gov/sra/SRX103303	22227116	Illumina Genome Analyzer II
Pseudomonas putida KT2440	AE015451	SRP003636	http://www.ncbi.nlm.nih.gov/sra/?term=SRA024356	21306427	Illumina Genome Analyzer II
Porphyromonas gingivalis W83	AE015924	SRP007420	http://www.ncbi.nlm.nih.gov/sra/?term=SRA039833	22037400	Illumina Genome Analyzer II
Bacillus cereus ATCC 14579	AE016877	ERP000575	http://www.ncbi.nlm.nih.gov/sra/ERX011940	22537947	Illumina Genome Analyzer II
Bacillus cereus ATCC 10987	AE017194	ERP000575	http://www.ncbi.nlm.nih.gov/sra/ERX011940	22537947	Illumina Genome Analyzer II
Nanoarchaeum equitans Kin4-M	AE017199	SRP013830	http://www.ncbi.nlm.nih.gov/geo/query/acc.cgi?acc=GSE38821	22809431	Illumina HiSeq 2000
Bacillus anthracis str. Sterne	AE017225	SRP001274	http://trace.ncbi.nlm.nih.gov/Traces/sra/?study=SRP001274	19304856	SOLid and Illumina/Solexa
Legionella pneumophila subsp. pneumophila str. Philadelphia 1	AE017354	SRP005683	http://www.ncbi.nlm.nih.gov/sra/?term=SRA029905	21408607	Illumina Genome Analyzer II
Mycobacterium tuberculosis H37Rv	AL123456	SRP015746	http://www.ncbi.nlm.nih.gov/sra/?term=SRA058740	23222129	Illumina Genome Analyzer IIx
Clostridium_difficile_630	AM180355	NA	(http://www.ebi.ac.uk/arrayexpress/experiments/E-ERAD-97/) Pers. Commun. Trevor Lawley, Laura Deakin	24568651	Illumina HiSeq 2000
Stenotrophomonas maltophilia K279a	AM743169	SRP014598	http://www.ncbi.nlm.nih.gov/sra/?term=SRA056411	22923593	Illumina Genome Analyzer IIx
Proteus mirabilis	AM942759	SRP007516	http://www.ncbi.nlm.nih.gov/sra/?term=SRA040168	22081397	Illumina Genome Analyzer II
Porphyromonas gingivalis ATCC 33277	AP009380	SRP009641	http://www.ncbi.nlm.nih.gov/sra/?term=SRA048510	23194602	AB SOLiD System 3.0
Prochlorococcus marinus subsp. pastoris str. CCMP1986	BX548174	SRP011374	http://www.ncbi.nlm.nih.gov/sra/?term=SRA050651	Broad Institute (BI)	Illumina Genome Analyzer II
Synechococcus elongatus PCC 7942	CP000100	SRP006795	http://www.ncbi.nlm.nih.gov/sra/?term=SRA036837	21612627	Illumina Genome Analyzer II
Rhodobacter sphaeroides 2.4.1	CP000143	SRP011373	http://www.ncbi.nlm.nih.gov/sra/?term=SRA050650	Broad Institute (BI)	Illumina Genome Analyzer II
	CP000144	SRP011373	http://www.ncbi.nlm.nih.gov/sra/?term=SRA050650	Broad Institute (BI)	Illumina Genome Analyzer II
Frankia sp. CcI3	CP000249	SRP007469	http://www.ncbi.nlm.nih.gov/sra/?term=SRA040049	21867524	Illumina Genome Analyzer IIx
Staphylococcus aureus subsp. aureus NCTC 8325	CP000253	SRP003288	http://www.ncbi.nlm.nih.gov/sra/?term=SRA023572	Cold Spring Harbor Laboratory	Illumina Genome Analyzer II
Pseudomonas aeruginosa UCBPP-PA14	CP000438	SRP009257	http://www.ncbi.nlm.nih.gov/sra/?term=SRA047974	22319605	Illumina Genome Analyzer IIx
Methanobrevibacter smithii ATCC 35061	CP000678	SRP004631	http://www.ncbi.nlm.nih.gov/sra/?term=SRA026682	21317366	Illumina Genome Analyzer II
Clostridium beijerinckii NCIMB 8052	CP000721	SRP008141	http://www.ncbi.nlm.nih.gov/sra/?term=SRA045799	21962126	Illumina Genome Analyzer IIx
Escherichia coli E24377A	CP000800	SRP008239	http://www.ncbi.nlm.nih.gov/sra/?term=SRA045945	22215741	Illumina Genome Analyzer II
Ignicoccus hospitalis KIN4/I	CP000816	SRP013830	http://www.ncbi.nlm.nih.gov/geo/query/acc.cgi?acc=GSE38821	22809431	Illumina HiSeq 2000	Ignicoccus hospitalis KIN4/I is a symbiont relationship with Nanoarchaeum equitans Kin4-M so they have the same experiment ID, PBID and source.
Histophilus somni 2336	CP000947	GSM732300	http://www.ncbi.nlm.nih.gov/geo/query/acc.cgi?acc=GSE29578	22276113	Illumina Genome Analyzer II
Synechococcus sp. PCC 7002	CP000951	SRP007372	http://www.ncbi.nlm.nih.gov/sra/?term=SRP007372	22514553	AB SOLiD System 3
Burkholderia glumae BGR1	CP001503	SRP011470	http://www.ncbi.nlm.nih.gov/sra/?term=SRA050776	23150539	Illumina Genome Analyzer II	Burkholderia glumae BGR1 has a pair of chromosome and both link sources are identical.
	CP001504	SRP011470	http://www.ncbi.nlm.nih.gov/sra/?term=SRP011470	23150539	Illumina Genome Analyzer II
Listeria monocytogenes 10403S	CP002002.1	SRP001753	http://www.ncbi.nlm.nih.gov/sra?term=SRP001753	20042087	Illumina Genome Analyzer
Micavibrio aeruginosavorus ARL-13	CP002382	NA	http://www.biomedcentral.com/1471-2164/12/453, Martin Wu, personal communication	21936919
Klebsiella pneumoniae subsp. pneumoniae HS11286	CP003200	SRP009682	http://www.ncbi.nlm.nih.gov/sra/?term=SRA048562	Division of Fish Health Management, Central Institute of Freshwater Aquaculture, Bhubaneswar-751002, Orissa, India	AB SOLiD 4 System
Vibrio splendidus LGP32	FM954972	SRP021844	http://trace.ncbi.nlm.nih.gov/Traces/sra/?study=SRP021844	23097430	Illumina Genome Analyzer IIx	Vibrio splendidus LGP32 has a pair of chromosome
	FM954973	SRP021844	http://trace.ncbi.nlm.nih.gov/Traces/sra/?study=SRP021844	23097430	Illumina Genome Analyzer IIx
Citrobacter rodentium ICC168	FN543502	ERP000493	http://www.ebi.ac.uk/ena/data/view/ERA015962	21490962	Illumina Genome Analyzer II
Mycoplasma pneumoniae M129	U00089	SRP000937	http://www.ncbi.nlm.nih.gov/sra/?term=SRA009091	20519413	Illumina Genome Analyzer II
Escherichia coli str. K-12 substr. MG1655	U00096	SRP011371	http://www.ncbi.nlm.nih.gov/sra/?term=SRA050648	21665928	Illumina Genome Analyzer II
Staphylococcus aureus subsp. aureus 15981	CP000253	SRP001753	http://www.ncbi.nlm.nih.gov/sra/SRX025759	22123973	Illumina Genome Analyzer
Salmonella enterica Typhi Ty2	AE014613	NA	ftp://ftp.sanger.ac.uk/pub/project/pathogens/st/solexa/Typhi_transcriptome/Typhi_plots/	19609351	Illumina Genome Analyzer
Salmonella enterica Typhi Ty2	AE014613	1104	ftp://ftp.sanger.ac.uk/pub/project/pathogens/st/solexa/Typhi_transcriptome/Typhi_plots/ (Pers. Commun. Tim Perkins)	19609351	Illumina Genome Analyzer
Salmonella enterica Typhi Ty2	AE014613	1354	ftp://ftp.sanger.ac.uk/pub/project/pathogens/st/solexa/Typhi_transcriptome/Typhi_plots/ (Pers. Commun. Tim Perkins)	19609351	Illumina Genome Analyzer
Pseudomonas aeruginoasa PA14	CP000438	SRP011370	http://www.ncbi.nlm.nih.gov/sra/?term=SRP011370	22590564	454 GS FLX Titanium
Pyrococcus furiosus DSM 3638	AE009950	SRP009098	http://trace.ncbi.nlm.nih.gov/Traces/sra/sra.cgi?sample=SRS269129	22227116	Illumina Genome Analyzer IIx
Pyrococcus furiosus DSM 3638	AE009950	SRP001575	http://www.ncbi.nlm.nih.gov/Traces/sra/?study=SRP001575	19945378	Illumina Genome Analyzer II
