# Supplementary material for: Robust Identification of Noncoding RNA from Transcriptomes Requires Phylogenetically-Informed Sampling
Source: PLoS Comput Biol. 2014 Oct 30;10(10):e1003907. doi: 10.1371/journal.pcbi.1003907 (PMC4214555; doi:10.1371/journal.pcbi.1003907)
Supplement: Table S3 — Quality control measures computed for each RNA-seq dataset used in this study. The values are defined in detail in the Methods section. (XLS) [file pcbi.1003907.s003.xls]

## Sheet: Sheet1
Species	EMBL	Experiment_ID	Dataset_ID	Strand_Correlation	Core_CDS_On	Core_Rfam_On	PPV	Specificity	Concordance_New_Metric	Coverage	Fraction_mapped_reads
Xanthomonas_citri_subsp._citri_306	AE008923.1	SRP013943	SRR516325	0.915894	0.85	0.833333	0.886379	0.710702	0.0404103	0.3516	0.954668
Xanthomonas_citri_subsp._citri_306	AE008923.1	SRP013943	SRR516336	0.925634	0.85	0.814815	0.888491	0.73913	0.0438439	0.3231	0.941014
Xanthomonas_citri_subsp._citri_306	AE008923.1	SRP013943	SRR516348	0.918733	0.85	0.925926	0.891908	0.779469	0.0493821	0.2818	0.981265
Xanthomonas_citri_subsp._citri_306	AE008923.1	SRP013943	SRR516356	0.90047	0.85	0.87037	0.88149	0.685258	0.0324304	0.3668	0.958573
Xanthomonas_citri_subsp._citri_306	AE008923.1	SRP013943	SRR516361	0.918554	0.85	0.851852	0.885452	0.750198	0.0389019	0.3012	0.952506
Xanthomonas_citri_subsp._citri_306	AE008923.1	SRP013943	SRR516369	0.916974	0.875	0.888889	0.883191	0.68247	0.0352125	0.3754	0.957478
Vibrio_cholerae_O1_biovar_El_Tor_N16961	AE003853	SRP005635	AE003853_SRR099209_2	-0.00570535	0	1	0.92133	0.78993	0.0843898	NA	NA
Vibrio_cholerae_O1_biovar_El_Tor_N16961	AE003853	SRP005635	AE003853_SRR099220_2	-0.00876933	0	0.666667	0.91392	0.680321	0.0727391	NA	NA
Vibrio_cholerae_O1_biovar_El_Tor_N16961	AE003852	SRP005635	AE003852_SRR099209_2	-0.0138279	0.975	1	0.938069	0.621499	0.0505276	NA	NA
Vibrio_cholerae_O1_biovar_El_Tor_N16961	AE003852	SRP005635	AE003852_SRR099220_2	-0.00815235	1	0.967213	0.930556	0.462984	0.0389279	NA	NA
Synechococcus_elongatus_PCC_7942	CP000100.1	SRP006795	SRR208051	-0.00277523	0.675	0.979167	0.831071	0.868104	-0.105259	0.0828	0.430665
Synechococcus_elongatus_PCC_7942	CP000100.1	SRP006795	SRR208052	-0.00113798	0	0.979167	0.853182	0.976343	-0.0673776	0.0171	0.055762
Synechococcus_elongatus_PCC_7942	CP000100.1	SRP006795	SRR208053	-0.00112027	0	0.979167	0.853126	0.97683	-0.0674725	0.0167	0.0550753
Synechococcus_elongatus_PCC_7942	CP000100.1	SRP006795	SRR208054	0.603267	1	1	0.896833	0.0541179	0.0046085	0.9721	0.940791
Synechococcus_elongatus_PCC_7942	CP000100.1	SRP006795	SRR208055	0.284654	1	1	0.893973	3.49847291657e-06	5.35143626488e-07	1	0.915058
Synechococcus_elongatus_PCC_7942	CP000100.1	SRP006795	SRR208056	0.650685	1	1	0.896713	0.0597609	0.00441567	0.9652	0.946447
Synechococcus_elongatus_PCC_7942	CP000100.1	SRP006795	SRR208057	0.123223	1	1	0.893974	1.74923645829e-05	2.67572011806e-06	1	0.919674
Synechococcus_elongatus_PCC_7942	CP000100.1	SRP006795	SRR208058	0.374722	1	1	0.894594	0.00721385	0.00100148	0.9986	0.801169
Synechococcus_elongatus_PCC_7942	CP000100.1	SRP006795	SRR208059	0.339323	1	1	0.894712	0.00875668	0.00119285	0.9982	0.907537
Synechococcus_elongatus_PCC_7002	CP000951.1	SRP007372	SRR308187	-0.0106005	0.875	0.913043	0.891482	0.535887	0.0132692	0.499	0.104362
Synechococcus_elongatus_PCC_7002	CP000951.1	SRP007372	SRR308188	-0.00283304	0.25	0.913043	0.884894	0.690825	0.0025679	0.3134	0.0741966
Synechococcus_elongatus_PCC_7002	CP000951.1	SRP007372	SRR308189	-0.0150308	0.55	0.913043	0.89399	0.566347	0.0173219	0.4773	0.0525566
Synechococcus_elongatus_PCC_7002	CP000951.1	SRP007372	SRR308190	-0.0118038	0.5	0.913043	0.884068	0.678704	0.00122176	0.3234	0.0544552
Synechococcus_elongatus_PCC_7002	CP000951.1	SRP007372	SRR308191	-0.00442337	0.8	0.913043	0.899947	0.619482	0.0269044	0.4438	0.0764528
Synechococcus_elongatus_PCC_7002	CP000951.1	SRP007372	SRR308192	-0.00741437	0.625	0.913043	0.888943	0.82022	0.00915424	0.1889	0.0338529
Synechococcus_elongatus_PCC_7002	CP000951.1	SRP007372	SRR308193	-0.00713625	0.675	0.913043	0.880046	0.863969	-0.00535781	0.1323	0.0326919
Synechococcus_elongatus_PCC_7002	CP000951.1	SRP007372	SRR308194	-0.0091585	0.8	0.913043	0.890928	0.770334	0.0123725	0.2457	0.038753
Sulfolobus_solfataricus_P2	AE006641.1	SRP001461	SRR030761	-0.00145116	0.175	0.12	0.887184	0.961728	0.0577877	0.0501	0.585482
Sulfolobus_solfataricus_P2	AE006641.1	SRP001461	SRR030762	-0.00338626	0.725	0.3	0.919392	0.915144	0.109235	0.1554	0.631592
Sulfolobus_solfataricus_P2	AE006641.1	SRP001461	SRR030763	-0.00234368	0.7	0.22	0.911468	0.900744	0.0967467	0.1655	0.61268
Sulfolobus_solfataricus_P2	AE006641.1	SRP001461	SRR030764	0.736306	0.375	0.1	0.929158	0.98055	0.124478	0.0405	0.628207
Sulfolobus_solfataricus_P2	AE006641.1	SRP001461	SRR030765	0.801388	0.775	0.14	0.940382	0.957939	0.141801	0.1042	0.757513
Sulfolobus_solfataricus_P2	AE006641.1	SRP001461	SRR030766	0.798936	0.175	0.14	0.908982	0.98402	0.0928062	0.0259	0.724573
Sulfolobus_solfataricus_P2	AE006641.1	SRP001461	SRR030767	0.842037	0.45	0.16	0.919991	0.978253	0.110175	0.0401	0.791092
Sulfolobus_solfataricus_P2	AE006641.1	SRP001461	SRR030768	0.840191	0	0.12	0.897336	0.985276	0.0742028	0.0212	0.688785
Stenotrophomonas_maltophilia	AM743169.1	SRP014598	SRR527852	-0.00157177	0.7	0.789474	0.837346	0.968412	-0.114905	0.0181	0.311389
Stenotrophomonas_maltophilia	AM743169.1	SRP014598	SRR527853	-0.000627534	0	0.631579	0.841197	0.987185	-0.108287	0.0075	0.069527
Stenotrophomonas_maltophilia	AM743169.1	SRP014598	SRR527854	-0.00165695	0.725	0.684211	0.848575	0.975036	-0.0956876	0.0154	0.348309
Stenotrophomonas_maltophilia	AM743169.1	SRP014598	SRR527855	-0.00108426	0.025	0.701754	0.822514	0.980179	-0.14069	0.0104	0.199576
Staphylococcus_aureus_subsp._aureus_15981	CP000253.1	SRP003288	SRR064320	-0.00269526	0.74359	1	0.808883	0.781986	-0.0881604	0.1599	0.164284
Staphylococcus_aureus_subsp._aureus_15981	CP000253.1	SRP003288	SRR064321	-0.000952081	0.128205	0.930233	0.854795	0.975023	-0.00851419	0.0241	0.0217485
Staphylococcus_aureus_subsp._aureus_15981	CP000253.1	SRP003288	SRR064322	-0.00157453	0.717949	1	0.816867	0.887871	-0.0739912	0.0858	0.102546
Staphylococcus_aureus_subsp._aureus_15981	CP000253.1	SRP003288	SRR388335	9.471536e-05	0.461538	1	0.76443	0.842616	-0.169707	0.0936	0.122332
Staphylococcus_aureus_subsp._aureus_15981	CP000253.1	SRP003288	SRR397556	0.848752	1	1	0.916682	0.600197	0.0923287	0.6725	0.955644
Staphylococcus_aureus_subsp._aureus_15981	CP000253.1	SRP003288	SRR397557	0.850492	1	1	0.899658	0.467036	0.0652847	0.7444	0.942788
Staphylococcus_aureus_subsp._aureus_15981	CP000253.1	SRP003288	SRR397558	0.851667	1	1	0.905536	0.505885	0.0746805	0.7331	0.966694
Salmonella_enterica_Typhi_Ty2	AE014613	1104	1104_2	0.0627977	0.725	0.109091	0.888364	0.83399	0.00530792	NA	NA
Salmonella_enterica_Typhi_Ty2	AE014613	1104	1104_3	0.0110216	0.225	0.0727273	0.91324	0.937561	0.0451499	NA	NA
Salmonella_enterica_Typhi_Ty2	AE014613	1354	1354_1	0.0240704	0.1	0.0363636	0.923178	0.919653	0.0607649	NA	NA
Salmonella_enterica_Typhi_Ty2	AE014613	1354	1354_2	0.023613	0	0.0181818	0.924891	0.988124	0.0634395	NA	NA
Salmonella_enterica_Typhi_Ty2	AE014613	876	876_2	0.0898472	0.525	0.163636	0.918453	0.894186	0.0533627	NA	NA
Salmonella_enterica_Typhi_Ty2	AE014613	876	876_5	0.408872	0.375	0.181818	0.931032	0.895085	0.0729878	NA	NA
Rhodobacter_sphaeroides	CP000144.1	SRP011373	SRR441716	0.922603	1	0.5	0.933728	0.86588	0.0801263	0.2362	0.950077
Rhodobacter_sphaeroides	CP000144.1	SRP011373	SRR441717	0.905419	0	0.416667	0.918201	0.93443	0.0559336	0.0936	0.948843
Rhodobacter_sphaeroides	CP000144.1	SRP011373	SRR441718	0.944439	0	0.25	0.911319	0.976859	0.0450808	0.0305	0.907612
Rhodobacter_sphaeroides	CP000144.1	SRP011373	SRR441719	0.895483	1	0.416667	0.917184	0.87522	0.0543358	0.1759	0.941
Rhodobacter_sphaeroides	CP000143.1	SRP011373	SRR441716	0.870624	0.925	0.5	0.943131	0.733549	0.072304	0.4825	0.950077
Rhodobacter_sphaeroides	CP000143.1	SRP011373	SRR441717	0.856312	0.9	0.380952	0.936351	0.869831	0.0618953	0.2106	0.948843
Rhodobacter_sphaeroides	CP000143.1	SRP011373	SRR441718	0.943383	0.725	0.142857	0.917066	0.970765	0.0318701	0.0363	0.907612
Rhodobacter_sphaeroides	CP000143.1	SRP011373	SRR441719	0.866812	0.9	0.357143	0.932051	0.782292	0.0552547	0.3299	0.941
Pyrococcus_furiosus	AE009950.1	SRX015089	SRR032433	-0.000314455	0.025641	0.478261	0.912037	0.924369	-0.0204277	0.0644	0.304913
Pyrococcus_furiosus	AE009950.1	SRX103303	SRR358786	0.00118201	0	0.0217391	0.983812	0.998203	0.0888622	0.0083	0.0108647
Pyrococcus_furiosus	AE009950.1	SRX103304	SRR358787	-0.000543562	0	0.717391	0.883476	0.91189	-0.0663296	0.0567	0.175088
Pseudomonas_putida_KT2440	AE015451.1	SRP003636	SRR066731	0.210313	0.769231	0.145833	0.940711	0.985443	0.078077	0.0267	0.409005
Pseudomonas_putida_KT2440	AE015451.1	SRP003636	SRR066732	0.2689	0.794872	0.1875	0.894564	0.973695	0.00550957	0.0272	0.436297
Pseudomonas_aeruginosa_PAO1	AE004091.2	SRP011370	SRR441575	7.847411e-05	0	0.25	0.896872	0.99923	-0.00322548	0.0008	0.537058
Pseudomonas_aeruginosa_PAO1	AE004091.2	SRP011370	SRR441576	0.939648	0	0.153846	0.965983	0.99977	0.10387	0.0007	0.361788
Pseudomonas_aeruginosa_PAO1	AE004091.2	SRP013960	SRR518528	0.87949	0.925	0.519231	0.925283	0.808609	0.0417661	0.259	0.926811
Pseudomonas_aeruginosa_PAO1	AE004091.2	SRP013960	SRR518529	0.900284	1	0.903846	0.911551	0.332185	0.0201957	0.7635	0.992478
Pseudomonas_aeruginosa_PAO1	AE004091.2	SRP013960	SRR518530	0.904653	1	0.711538	0.919666	0.691991	0.0329825	0.3877	0.991781
Pseudomonas_aeruginosa_PAO1	AE004091.2	SRP013960	SRR518533	0.00138377	1	1	0.883883	0.273099	-0.0242734	0.633	0.846968
Pseudomonas_aeruginosa_PAO1	AE004091.2	SRP013960	SRR519062	0.720033	1	0.980769	0.89844	0.596415	-0.000705253	0.4018	0.764455
Pseudomonas_aeruginosa_PAO1	AE004091.2	SRP013960	SRR519063	0.859408	1	0.769231	0.917532	0.50128	0.0296306	0.6115	0.991315
Pseudomonas_aeruginosa_PA14	CP000438.1	SRP009257	SRR363800	-0.00388544	0.9	0.823529	0.897235	0.792115	-0.00415001	0.2027	0.924412
Pseudomonas_aeruginosa_PA14	CP000438.1	SRP009257	SRR363801	-0.00281715	0.875	0.784314	0.898268	0.833256	-0.00248987	0.1642	0.94233
Pseudomonas_aeruginosa_PA14	CP000438.1	SRP009257	SRR363802	-0.00205552	0.75	0.843137	0.837541	0.823797	-0.103476	0.1087	0.939069
Pseudomonas_aeruginosa_PA14	CP000438.1	SRP009257	SRR363803	-0.00149965	0.75	0.882353	0.847439	0.889114	-0.0865258	0.0728	0.946345
Pseudomonas_aeruginosa_PA14	CP000438.1	SRP009257	SRR363804	-0.000927342	0.625	0.764706	0.862115	0.981	-0.0617561	0.0138	0.932793
Pseudomonas_aeruginosa_PA14	CP000438.1	SRP009257	SRR363805	-0.000801881	0.75	0.745098	0.886218	0.977128	-0.0219748	0.0201	0.93201
Pseudomonas_aeruginosa_PA14	CP000438.1	SRP009257	SRR363806	-0.00106529	0.55	0.960784	0.765539	0.929626	-0.23316	0.0301	0.920801
Pseudomonas_aeruginosa_PA14	CP000438.1	SRP009257	SRR363807	-0.00140305	0.75	0.960784	0.823919	0.916394	-0.127134	0.0476	0.944848
Pseudomonas_aeruginosa_PA14	CP000438.1	SRP011370	SRR441577	0.000188889	0	0.27451	0.892014	0.99905	-0.0125699	0.0009	0.47763
Pseudomonas_aeruginosa_PA14	CP000438.1	SRP011370	SRR441578	0.978566	0	0.235294	0.914142	0.999217	0.0227826	0.0009	0.492325
Proteus_mirabilis	AM942759.1	SRP007516	SRR314890	0.701813	0.9	0.482143	0.938332	0.898335	0.101051	0.2063	0.643527
Proteus_mirabilis	AM942759.1	SRP007516	SRR314891	0.696036	0.95	0.553571	0.936033	0.847703	0.0975133	0.298	0.643491
Proteus_mirabilis	AM942759.1	SRP007516	SRR314892	0.745997	0.95	0.607143	0.936942	0.847383	0.0989126	0.3029	0.659065
Proteus_mirabilis	AM942759.1	SRP007516	SRR314893	0.684673	0.925	0.535714	0.933859	0.866473	0.0941578	0.2526	0.659918
Prochlorococcus_marinus_MED4_CCMP1986	BX548174.1	SRP011374	SRR441714	0.773247	0.9	0.604651	0.935029	0.647027	0.0380089	0.4851	0.984349
Prochlorococcus_marinus_MED4_CCMP1986	BX548174.1	SRP011374	SRR441715	0.933897	0.725	0.186047	0.938959	0.907026	0.0440594	0.136	0.98644
Porphyromonas_gingivalis_W83	AE015924.1	SRP007420	SRR307053	-0.00347541	0.421053	1	0.927018	0.930202	0.0865909	0.1214	0.215607
Porphyromonas_gingivalis_W83	AE015924.1	SRP007420	SRR307054	-0.00614901	0.894737	1	0.945186	0.866983	0.114591	0.3082	0.298103
Porphyromonas_gingivalis_W83	AE015924.1	SRP007420	SRR307055	-0.0112337	0.973684	1	0.927021	0.682586	0.0865951	0.5523	0.95071
Porphyromonas_gingivalis_ATCC_33277	AP009380.1	SRP009641	SRR387923	0.667898	1	0.886364	0.912644	0.364205	0.0340873	0.7909	0.0561651
Porphyromonas_gingivalis_ATCC_33277	AP009380.1	SRP009641	SRR387924	0.543035	1	0.886364	0.902726	0.231777	0.0183234	0.8582	0.131499
Porphyromonas_gingivalis_ATCC_33277	AP009380.1	SRP009641	SRR387925	0.385755	1	0.727273	0.920587	0.492683	0.046588	0.6942	0.042957
Porphyromonas_gingivalis_ATCC_33277	AP009380.1	SRP009641	SRR387926	0.725981	0.974359	0.886364	0.917795	0.482819	0.0422072	0.6837	0.0933902
Porphyromonas_gingivalis_ATCC_33277	AP009380.1	SRP009641	SRR387927	0.717082	1	0.886364	0.901153	0.219155	0.0158061	0.8584	0.240219
Porphyromonas_gingivalis_ATCC_33277	AP009380.1	SRP009641	SRR387928	0.483792	1	0.863636	0.915138	0.360997	0.0380235	0.8182	0.0770594
Porphyromonas_gingivalis_ATCC_33277	AP009380.1	SRP009641	SRR387929	0.442448	1	0.863636	0.909682	0.330782	0.0293975	0.8052	0.0327764
Porphyromonas_gingivalis_ATCC_33277	AP009380.1	SRP009641	SRR387930	0.423879	1	0.886364	0.925681	0.486028	0.0545495	0.7515	0.0634424
Porphyromonas_gingivalis_ATCC_33277	AP009380.1	SRP009641	SRR387931	0.61047	1	0.863636	0.906917	0.286588	0.0250051	0.8328	0.0793008
Porphyromonas_gingivalis_ATCC_33277	AP009380.1	SRP009641	SRR387932	0.430237	1	0.795455	0.919144	0.439888	0.0443256	0.7528	0.053707
Ignicoccus_hospitalis	AE017199.1	SRP013830	SRR514574	-0.0149647	0.394737	0.378378	0.912801	0.618843	-0.0267092	0.3066	0.246858
Ignicoccus_hospitalis	AE017199.1	SRP013830	SRR514575	-0.0154868	0.342105	0.405405	0.914132	0.625639	-0.0246069	0.3058	0.247045
Ignicoccus_hospitalis	AE017199.1	SRP013830	SRR514576	-0.0143474	0.394737	0.378378	0.910044	0.605599	-0.0310737	0.3075	0.247029
Ignicoccus_hospitalis	AE017199.1	SRP013830	SRR514577	-0.0152577	0.315789	0.459459	0.910243	0.611902	-0.0307583	0.3033	0.243891
Ignicoccus_hospitalis	AE017199.1	SRP013830	SRR514578	-0.0106545	0.0526316	0.108108	0.822789	0.754008	-0.176488	0.0974	0.249073
Mycoplasma_pneumoniae_M129	U00089.2	SRP000937	SRR019711	-0.00733142	0	0.175	0.959574	0.976276	0.0975455	0.0605	0.969892
Mycoplasma_pneumoniae_M129	U00089.2	SRP000937	SRR019712	-0.00760388	0.027027	0.275	0.960068	0.956566	0.0982871	0.1122	0.945648
Mycoplasma_pneumoniae_M129	U00089.2	SRP000937	SRR019713	-0.00892398	0.297297	0.55	0.955332	0.892341	0.0911536	0.2486	0.949179
Mycoplasma_pneumoniae_M129	U00089.2	SRP000937	SRR019714	-0.00832001	0.216216	0.375	0.961148	0.93701	0.0999092	0.1673	0.984943
Mycoplasma_pneumoniae_M129	U00089.2	SRP000937	SRR019715	-0.00796134	0	0.15	0.960291	0.979732	0.098623	0.0527	0.983779
Mycoplasma_pneumoniae_M129	U00089.2	SRP000937	SRR019716	-0.00766893	0	0.125	0.963422	0.98124	0.103318	0.0529	0.968853
Mycoplasma_pneumoniae_M129	U00089.2	SRP000937	SRR020510	-0.000478662	0	0	NA	1	NA	0	7.6701e-06
Mycoplasma_pneumoniae_M129	U00089.2	SRP000937	SRR029642	0.00724139	0	0	1	1	0.157079	0.0003	1.99284e-05
Mycoplasma_pneumoniae_M129	U00089.2	SRP000937	SRR060824	0.0453366	0	0	0.900632	0.997946	0.00608839	0.0021	0.000199367
Mycobacterium_tuberculosis	AL123456.3	SRP015746	SRR568038	-0.00393886	0.825	1	0.911839	0.723887	-0.00451681	0.2672	0.939152
Mycobacterium_tuberculosis	AL123456.3	SRP015746	SRR568039	-0.0259632	1	1	0.92239	0.351505	0.0120809	0.7128	0.891202
Mycobacterium_tuberculosis	AL123456.3	SRP015746	SRR568040	-0.00165925	0.3	1	0.873373	0.803295	-0.0666978	0.1325	0.902406
Micavibrio_aeruginosavorus_ARL-13	CP002382	max	max	1	0.794872	0.152174	0.931162	0.813694	0.0417115	NA	NA
Methanobrevibacter_smithii_ATCC_35061	CP000678.1	SRP004631	SRR073604	0.773574	0.25	0.117647	0.949465	0.93972	0.0634382	0.109	0.947362
Methanobrevibacter_smithii_ATCC_35061	CP000678.1	SRP004631	SRR073605	0.650647	0.1	0.205882	0.931064	0.957453	0.0352041	0.0564	0.949729
Methanobrevibacter_smithii_ATCC_35061	CP000678.1	SRP004631	SRR073606	0.259914	0	0.117647	0.962396	0.99778	0.082955	0.0054	0.947707
Methanobrevibacter_smithii_ATCC_35061	CP000678.1	SRP004631	SRR073607	0.725639	0.1	0.205882	0.944337	0.969346	0.0556252	0.0503	0.964462
Methanobrevibacter_smithii_ATCC_35061	CP000678.1	SRP004631	SRR073608	0.702816	0.25	0.117647	0.940486	0.946257	0.0497311	0.0825	0.824964
Methanobrevibacter_smithii_ATCC_35061	CP000678.1	SRP004631	SRR073609	0.7084	0.175	0.147059	0.942027	0.946363	0.0520928	0.0845	0.82471
Methanobrevibacter_smithii_ATCC_35061	CP000678.1	SRP004631	SRR073610	0.67989	0	0.0882353	0.901617	0.993711	-0.0111619	0.0058	0.973064
Methanobrevibacter_smithii_ATCC_35061	CP000678.1	SRP004631	SRR073611	0.967474	0.925	0.176471	0.97851	0.913867	0.106911	0.3663	0.995841
Methanobrevibacter_smithii_ATCC_35061	CP000678.1	SRP004631	SRR073612	0.596078	0	0.205882	0.927584	0.97981	0.0298012	0.0255	0.971643
Methanobrevibacter_smithii_ATCC_35061	CP000678.1	SRP004631	SRR073613	0.629831	0	0.117647	0.923922	0.961256	0.0240945	0.0465	0.920338
Methanobrevibacter_smithii_ATCC_35061	CP000678.1	SRP004631	SRR073614	0.734771	0.3	0.5	0.933639	0.909674	0.0391889	0.1244	0.877412
Methanobrevibacter_smithii_ATCC_35061	CP000678.1	SRP004631	SRR073615	0.607385	0	0.117647	0.940017	0.966175	0.0490111	0.0515	0.939904
Methanobrevibacter_smithii_ATCC_35061	CP000678.1	SRP004631	SRR073616	0.645562	0.15	0.264706	0.920027	0.950668	0.0179999	0.0564	0.934787
Methanobrevibacter_smithii_ATCC_35061	CP000678.1	SRP004631	SRR073617	0.742887	0	0.117647	0.925128	0.973002	0.0259766	0.033	0.951886
Methanobrevibacter_smithii_ATCC_35061	CP000678.1	SRP004631	SRR073618	0.18826	0	0.0588235	0.856434	0.993333	-0.0853333	0.0042	0.957124
Methanobrevibacter_smithii_ATCC_35061	CP000678.1	SRP004631	SRR073619	0.570488	0	0.117647	0.931064	0.971348	0.0352042	0.038	0.937065
Methanobrevibacter_smithii_ATCC_35061	CP000678.1	SRP004631	SRR073620	0.780729	0.025	0.147059	0.929822	0.958859	0.0332784	0.0536	0.896465
Methanobrevibacter_smithii_ATCC_35061	CP000678.1	SRP004631	SRR073621	0.738013	0	0.117647	0.92552	0.973604	0.026588	0.0324	0.951596
Methanobrevibacter_smithii_ATCC_35061	CP000678.1	SRP004631	SRR073622	0.596121	0.075	0.264706	0.905962	0.945879	-0.00422485	0.0526	0.925159
Methanobrevibacter_smithii_ATCC_35061	CP000678.1	SRP004631	SRR073623	0.652946	0.15	0.264706	0.923758	0.952475	0.0238383	0.057	0.935671
Methanobrevibacter_smithii_ATCC_35061	CP000678.1	SRP004631	SRR073624	0.635219	0.125	0.294118	0.951394	0.955593	0.0663667	0.0835	0.988167
Methanobrevibacter_smithii_ATCC_35061	CP000678.1	SRP004631	SRR073625	0.599157	0	0.117647	0.922986	0.977761	0.0226323	0.0264	0.948866
Methanobrevibacter_smithii_ATCC_35061	CP000678.1	SRP004631	SRR073626	0.745468	0.35	0.264706	0.953281	0.938403	0.0692252	0.1205	0.975956
Methanobrevibacter_smithii_ATCC_35061	CP000678.1	SRP004631	SRR073627	0.302777	0	0.117647	0.961361	0.997431	0.081402	0.0061	0.956435
Methanobrevibacter_smithii_ATCC_35061	CP000678.1	SRP004631	SRR073628	0.251406	0	0.147059	0.931456	0.995199	0.0358117	0.0064	0.946346
Methanobrevibacter_smithii_ATCC_35061	CP000678.1	SRP004631	SRR073629	0.548688	0	0.147059	0.898078	0.963057	-0.016836	0.0331	0.902952
Methanobrevibacter_smithii_ATCC_35061	CP000678.1	SRP004631	SRR073630	0.677157	0	0.117647	0.916347	0.97782	0.0122187	0.0242	0.955648
Methanobrevibacter_smithii_ATCC_35061	CP000678.1	SRP004631	SRR073631	0.624414	0.075	0.147059	0.955773	0.980159	0.0729914	0.041	0.96887
Methanobrevibacter_smithii_ATCC_35061	CP000678.1	SRP004631	SRR073632	0.220631	0	0.117647	0.890605	0.992554	-0.0288908	0.0062	0.92739
Methanobrevibacter_smithii_ATCC_35061	CP000678.1	SRP004631	SRR073633	0.566989	0.025	0.147059	0.93037	0.956249	0.0341293	0.0574	0.936798
Methanobrevibacter_smithii_ATCC_35061	CP000678.1	SRP004631	SRR073634	0.551246	0.05	0.147059	0.930176	0.957926	0.0338274	0.0551	0.935213
Methanobrevibacter_smithii_ATCC_35061	CP000678.1	SRP004631	SRR073635	0.654402	0	0.117647	0.94023	0.971673	0.0493381	0.0433	0.97164
Methanobrevibacter_smithii_ATCC_35061	CP000678.1	SRP004631	SRR073636	0.76374	0.275	0.147059	0.940451	0.951707	0.0496766	0.0741	0.924388
Methanobrevibacter_smithii_ATCC_35061	CP000678.1	SRP004631	SRR073637	0.550705	0.025	0.176471	0.91712	0.978759	0.0134342	0.0234	0.96846
Methanobrevibacter_smithii_ATCC_35061	CP000678.1	SRP004631	SRR073638	0.658896	0	0.117647	0.903282	0.97769	-0.0084996	0.0211	0.954349
Methanobrevibacter_smithii_ATCC_35061	CP000678.1	SRP004631	SRR073639	0.65094	0	0.117647	0.910708	0.963754	0.00331305	0.0371	0.928279
Methanobrevibacter_smithii_ATCC_35061	CP000678.1	SRP004631	SRR073640	0.947448	0.95	0.588235	0.971185	0.838682	0.0960695	0.5116	0.987174
Methanobrevibacter_smithii_ATCC_35061	CP000678.1	SRP004631	SRR073641	0.299566	0	0.117647	0.954303	0.997213	0.070772	0.0056	0.952134
Methanobrevibacter_smithii_ATCC_35061	CP000678.1	SRP004631	SRR073642	0.617612	0.075	0.147059	0.956028	0.980649	0.0733771	0.0402	0.96792
Methanobrevibacter_smithii_ATCC_35061	CP000678.1	SRP004631	SRR073643	0.457434	0.05	0.294118	0.90467	0.979556	-0.00628418	0.0196	0.949059
Methanobrevibacter_smithii_ATCC_35061	CP000678.1	SRP004631	SRR073644	0.552059	0	0.117647	0.89209	0.976179	-0.0264868	0.0202	0.943134
Methanobrevibacter_smithii_ATCC_35061	CP000678.1	SRP004631	SRR073645	0.231407	0	0.0882353	0.939961	0.996362	0.0489249	0.0055	0.901299
Methanobrevibacter_smithii_ATCC_35061	CP000678.1	SRP004631	SRR073646	0.600634	0	0.147059	0.942631	0.968047	0.0530169	0.0509	0.940125
Methanobrevibacter_smithii_ATCC_35061	CP000678.1	SRP004631	SRR073647	0.565196	0.05	0.117647	0.910278	0.95319	0.00263172	0.0477	0.874214
Methanobrevibacter_smithii_ATCC_35061	CP000678.1	SRP004631	SRR073648	0.959848	0.925	0.5	0.970523	0.869584	0.0950869	0.4043	0.990902
Methanobrevibacter_smithii_ATCC_35061	CP000678.1	SRP004631	SRR073649	0.837445	0.1	0.176471	0.936979	0.968768	0.0443414	0.0453	0.973567
Methanobrevibacter_smithii_ATCC_35061	CP000678.1	SRP004631	SRR073650	0.66492	0	0.117647	0.913964	0.96435	0.00846076	0.0379	0.92887
Methanobrevibacter_smithii_ATCC_35061	CP000678.1	SRP004631	SRR073651	0.530183	0	0.117647	0.932483	0.963784	0.0374021	0.049	0.949094
Methanobrevibacter_smithii_ATCC_35061	CP000678.1	SRP004631	SRR073652	0.660215	0	0.117647	0.940786	0.971785	0.0501902	0.0435	0.971786
Methanobrevibacter_smithii_ATCC_35061	CP000678.1	SRP004631	SRR073653	0.587254	0	0.147059	0.930477	0.97012	0.034295	0.0393	0.938389
Methanobrevibacter_smithii_ATCC_35061	CP000678.1	SRP004631	SRR073654	0.579084	0	0.176471	0.917912	0.977041	0.0146804	0.0256	0.948632
Methanobrevibacter_smithii_ATCC_35061	CP000678.1	SRP004631	SRR073655	0.772717	0.275	0.117647	0.950096	0.939874	0.0643978	0.1101	0.948493
Methanobrevibacter_smithii_ATCC_35061	CP000678.1	SRP004631	SRR073656	0.191712	0	0.0588235	0.965069	0.997951	0.0869568	0.0054	0.941678
Methanobrevibacter_smithii_ATCC_35061	CP000678.1	SRP004631	SRR073657	0.610891	0.1	0.205882	0.925064	0.939549	0.0258773	0.0737	0.925857
Methanobrevibacter_smithii_ATCC_35061	CP000678.1	SRP004631	SRR073658	0.552893	0	0.117647	0.909735	0.958552	0.00177049	0.042	0.875891
Methanobrevibacter_smithii_ATCC_35061	CP000678.1	SRP004631	SRR073659	0.663543	0	0.117647	0.914974	0.977926	0.0100547	0.0237	0.955009
Methanobrevibacter_smithii_ATCC_35061	CP000678.1	SRP004631	SRR073660	0.776692	0	0.147059	0.930673	0.959384	0.0345984	0.0535	0.895924
Methanobrevibacter_smithii_ATCC_35061	CP000678.1	SRP004631	SRR073661	0.723888	0.075	0.205882	0.944657	0.96973	0.0561152	0.05	0.964124
Methanobrevibacter_smithii_ATCC_35061	CP000678.1	SRP004631	SRR073662	0.624332	0	0.117647	0.92421	0.96151	0.024545	0.0464	0.919867
Methanobrevibacter_smithii_ATCC_35061	CP000678.1	SRP004631	SRR073663	0.579122	0.05	0.147059	0.936147	0.968697	0.0430593	0.0448	0.976682
Methanobrevibacter_smithii_ATCC_35061	CP000678.1	SRP004631	SRR073664	0.639367	0.025	0.176471	0.941208	0.974903	0.0508379	0.039	0.958061
Methanobrevibacter_smithii_ATCC_35061	CP000678.1	SRP004631	SRR073665	0.367957	0.075	0.117647	0.888829	0.947302	-0.0317695	0.0433	0.957911
Methanobrevibacter_smithii_ATCC_35061	CP000678.1	SRP004631	SRR073666	0.606238	0	0.117647	0.926059	0.977968	0.0274278	0.0272	0.949874
Methanobrevibacter_smithii_ATCC_35061	CP000678.1	SRP004631	SRR073667	0.600288	0.05	0.264706	0.924332	0.979131	0.0247351	0.0252	0.966181
Methanobrevibacter_smithii_ATCC_35061	CP000678.1	SRP004631	SRR073668	0.608491	0	0.205882	0.926064	0.97857	0.0274359	0.0265	0.972664
Methanobrevibacter_smithii_ATCC_35061	CP000678.1	SRP004631	SRR073669	0.592271	0.075	0.205882	0.923087	0.941864	0.0227908	0.0691	0.926444
Methanobrevibacter_smithii_ATCC_35061	CP000678.1	SRP004631	SRR073670	0.72668	0.3	0.588235	0.933287	0.906391	0.0386449	0.1282	0.881848
Methanobrevibacter_smithii_ATCC_35061	CP000678.1	SRP004631	SRR073671	0.58655	0.05	0.235294	0.923826	0.979663	0.0239444	0.0244	0.965357
Methanobrevibacter_smithii_ATCC_35061	CP000678.1	SRP004631	SRR073672	0.525689	0	0.117647	0.934312	0.965136	0.040229	0.0485	0.948558
Methanobrevibacter_smithii_ATCC_35061	CP000678.1	SRP004631	SRR073673	0.750713	0.35	0.294118	0.952924	0.937482	0.0686846	0.1214	0.976337
Methanobrevibacter_smithii_ATCC_35061	CP000678.1	SRP004631	SRR073674	0.631081	0.125	0.294118	0.948699	0.953827	0.0622738	0.0822	0.987929
Methanobrevibacter_smithii_ATCC_35061	CP000678.1	SRP004631	SRR073675	0.59413	0.05	0.147059	0.937761	0.967775	0.0455441	0.0473	0.976981
Methanobrevibacter_smithii_ATCC_35061	CP000678.1	SRP004631	SRR073676	0.555834	0.025	0.205882	0.91512	0.978039	0.0102856	0.0236	0.968725
Methanobrevibacter_smithii_ATCC_35061	CP000678.1	SRP004631	SRR073677	0.762594	0.225	0.147059	0.940538	0.951194	0.04981	0.075	0.923899
Methanobrevibacter_smithii_ATCC_35061	CP000678.1	SRP004631	SRR073678	0.583062	0	0.176471	0.918823	0.977696	0.0161111	0.0251	0.9487
Methanobrevibacter_smithii_ATCC_35061	CP000678.1	SRP004631	SRR073679	0.941346	0.975	0.470588	0.968413	0.800942	0.091947	0.5759	0.992705
Methanobrevibacter_smithii_ATCC_35061	CP000678.1	SUBSET	SRR073604	0.773574	0.25	0.117647	0.949465	0.93972	0.0634382	0.109	0.947362
Methanobrevibacter_smithii_ATCC_35061	CP000678.1	SUBSET	SRR073610	0.67989	0	0.0882353	0.901617	0.993711	-0.0111619	0.0058	0.973064
Methanobrevibacter_smithii_ATCC_35061	CP000678.1	SUBSET	SRR073611	0.967474	0.925	0.176471	0.97851	0.913867	0.106911	0.3663	0.995841
Methanobrevibacter_smithii_ATCC_35061	CP000678.1	SUBSET	SRR073614	0.734771	0.3	0.5	0.933639	0.909674	0.0391889	0.1244	0.877412
Methanobrevibacter_smithii_ATCC_35061	CP000678.1	SUBSET	SRR073618	0.18826	0	0.0588235	0.856434	0.993333	-0.0853333	0.0042	0.957124
Methanobrevibacter_smithii_ATCC_35061	CP000678.1	SUBSET	SRR073624	0.635219	0.125	0.294118	0.951394	0.955593	0.0663667	0.0835	0.988167
Methanobrevibacter_smithii_ATCC_35061	CP000678.1	SUBSET	SRR073626	0.745468	0.35	0.264706	0.953281	0.938403	0.0692252	0.1205	0.975956
Methanobrevibacter_smithii_ATCC_35061	CP000678.1	SUBSET	SRR073640	0.947448	0.95	0.588235	0.971185	0.838682	0.0960695	0.5116	0.987174
Methanobrevibacter_smithii_ATCC_35061	CP000678.1	SUBSET	SRR073648	0.959848	0.925	0.5	0.970523	0.869584	0.0950869	0.4043	0.990902
Methanobrevibacter_smithii_ATCC_35061	CP000678.1	SUBSET	SRR073649	0.837445	0.1	0.176471	0.936979	0.968768	0.0443414	0.0453	0.973567
Methanobrevibacter_smithii_ATCC_35061	CP000678.1	SUBSET	SRR073655	0.772717	0.275	0.117647	0.950096	0.939874	0.0643978	0.1101	0.948493
Methanobrevibacter_smithii_ATCC_35061	CP000678.1	SUBSET	SRR073665	0.367957	0.075	0.117647	0.888829	0.947302	-0.0317695	0.0433	0.957911
Methanobrevibacter_smithii_ATCC_35061	CP000678.1	SUBSET	SRR073670	0.72668	0.3	0.588235	0.933287	0.906391	0.0386449	0.1282	0.881848
Methanobrevibacter_smithii_ATCC_35061	CP000678.1	SUBSET	SRR073673	0.750713	0.35	0.294118	0.952924	0.937482	0.0686846	0.1214	0.976337
Methanobrevibacter_smithii_ATCC_35061	CP000678.1	SUBSET	SRR073674	0.631081	0.125	0.294118	0.948699	0.953827	0.0622738	0.0822	0.987929
Methanobrevibacter_smithii_ATCC_35061	CP000678.1	SUBSET	SRR073679	0.941346	0.975	0.470588	0.968413	0.800942	0.091947	0.5759	0.992705
Listeria_monocytogenes	CP002002.1	FROM_STAPH	SRR392745	0.00779552	0.725	1	0.885836	0.63739	-0.0388962	0.2857	0.164164
Listeria_monocytogenes	CP002002.1	SRP001753	SRR331094	0.742719	0	0.0444444	1	1	0.135993	0.0034	0.051704
Listeria_monocytogenes	CP002002.1	SRP001753	SRR331095	0.772617	0	0.0222222	0.993565	0.999663	0.126679	0.0047	0.0571421
Listeria_monocytogenes	CP002002.1	SRP001753	SRR331096	0.797602	0	0.0444444	1	1	0.135993	0.0035	0.0577431
Listeria_monocytogenes	CP002002.1	SRP001753	SRR331097	0.728484	0	0.0222222	0.994662	0.999724	0.128272	0.0046	0.0684264
Legionella_pneumophila	AE017354.1	SRP005683	SRR099824	0.179043	0.846154	0.765957	0.941577	0.864276	0.0846511	0.2604	0.49128
Legionella_pneumophila	AE017354.1	SRP005683	SRR099825	0.159313	0.846154	0.723404	0.941118	0.865996	0.0839484	0.2551	0.500419
Legionella_pneumophila	AE017354.1	SRP005683	SRR099826	0.0168835	0.769231	0.425532	0.953874	0.961142	0.103371	0.0944	0.181944
Legionella_pneumophila	AE017354.1	SRP005683	SRR099827	0.0158445	0.769231	0.361702	0.954088	0.966357	0.103694	0.0821	0.179013
Legionella_pneumophila	AE017354.1	SRP005683	SRR099828	0.228265	0.641026	0.425532	0.942343	0.908603	0.085825	0.1777	0.967927
Legionella_pneumophila	AE017354.1	SRP005683	SRR099829	0.204748	0.641026	0.361702	0.942974	0.914556	0.0867902	0.1679	0.974359
Legionella_pneumophila	AE017354.1	SRP005683	SRR099830	0.0210445	0.794872	0.531915	0.952057	0.91641	0.10062	0.1954	0.45721
Legionella_pneumophila	AE017354.1	SRP005683	SRR099831	0.00548848	0.641026	0.212766	0.948611	0.979812	0.0953887	0.044	0.398747
Legionella_pneumophila	AE017354.1	SRP005683	SRR099832	0.29471	0.948718	0.765957	0.94179	0.838245	0.0849779	0.3115	0.975606
Legionella_pneumophila	AE017354.1	SRP005683	SRR099833	0.316906	0.974359	0.787234	0.940302	0.818538	0.0826967	0.3407	0.978765
Klebsiella_pneumoniae_cifa_HP1	CP003200.1	SRP009682	SRR389178	-0.0244792	1	0.846154	0.901253	0.5788	0.0185981	0.4704	0.340446
Klebsiella_pneumoniae_cifa_HP1	CP003200.1	SRP009682	SRR389180	-0.0214991	0.975	0.846154	0.898309	0.558504	0.013878	0.4788	0.316283
Ignicoccus_hospitalis	CP000816.1	SRP013830	SRR514574	-0.00347101	0	0.219512	0.882237	0.904357	-0.0773025	0.0562	0.108563
Ignicoccus_hospitalis	CP000816.1	SRP013830	SRR514575	-0.00355164	0	0.195122	0.88759	0.90566	-0.0685751	0.0581	0.108627
Ignicoccus_hospitalis	CP000816.1	SRP013830	SRR514576	-0.00349884	0	0.195122	0.886978	0.904869	-0.0695706	0.0582	0.108254
Ignicoccus_hospitalis	CP000816.1	SRP013830	SRR514577	-0.00351663	0	0.195122	0.886448	0.909524	-0.0704332	0.0551	0.106591
Ignicoccus_hospitalis	CP000816.1	SRP013830	SRR514578	-0.0027046	0	0.097561	0.86288	0.976613	-0.109309	0.0118	0.108724
Histophilus_somnus_2336	CP000947.1	GSM732300	hs2336	0.956362	1	0.869565	0.959679	0.740445	0.0969808	0.6612	1
Helicobacter_pylori	AE000511.1	SRP001481	SRR031126	-0.0155469	1	1	0.928025	0.263827	0.0170972	0.848	0.624079
Helicobacter_pylori	AE000511.1	SRP001481	SRR031127	-0.0271918	1	1	0.920121	0.122751	0.00475759	0.9105	0.657845
Helicobacter_pylori	AE000511.1	SRP001481	SRR031128	-0.0049022	0.769231	1	0.879857	0.300029	-0.0597969	0.483	0.317768
Helicobacter_pylori	AE000511.1	SRP001481	SRR031129	-0.0118778	1	1	0.91675	0.0961817	-0.000537675	0.9001	0.580962
Helicobacter_pylori	AE000511.1	SRP001481	SRR031130	-0.0220905	0.974359	1	0.915673	0.0924573	-0.00223288	0.8923	0.530347
Helicobacter_pylori	AE000511.1	SRP001481	SRR031131	-0.00212062	0	0.0952381	0.924481	0.995393	0.0115782	0.0051	0.0355086
Helicobacter_pylori	AE000511.1	SRP001481	SRR031142	-0.00121665	0	0	1	1	0.124862	0.0004	0.00458631
Helicobacter_pylori	AE000511.1	SRP001481	SRR031143	-0.0019165	0	0	1	1	0.124862	0.0001	0.00574684
Helicobacter_pylori	AE000511.1	SRP001481	SRR031144	-0.00236325	0	0	0.857647	0.99825	-0.0966819	0.001	0.0335061
Helicobacter_pylori	AE000511.1	SRP001481	SRR031145	-0.00174533	0	0	1	1	0.124862	0.0001	0.0125571
Helicobacter_pylori	AE000511.1	SRP001481	SRR031146	-0.00142424	0	0	NA	1	NA	0	0.00199777
Helicobacter_pylori	AE000511.1	SRP001481	SRR031178	-0.00193129	0	0.0952381	0.927591	0.99569	0.0164225	0.0049	0.0328791
Helicobacter_pylori	AE000511.1	SRP001481	SRR031179	-0.00200635	0	0.119048	0.881068	0.992718	-0.0578132	0.0051	0.0342601
Helicobacter_pylori	AE000511.1	SRP001481	SRR031180	-0.00229194	0	0.119048	0.856158	0.990194	-0.0991892	0.0057	0.0377019
Helicobacter_pylori	AE000511.1	SRP001481	SRR031181	-0.00186349	0	0.0952381	0.981021	0.999045	0.0972178	0.0042	0.030661
Helicobacter_pylori	AE000511.1	SRP001481	SRR031182	-0.00113196	0	0.0238095	0.995227	0.999826	0.117959	0.003	0.0219044
Helicobacter_pylori	AE000511.1	SRP001481	SRR031183	-0.00108722	0	0	0.994843	0.999826	0.117403	0.0028	0.0186958
Helicobacter_pylori	AE000511.1	SRP001481	SRR031184	-0.00114099	0	0.0238095	0.989471	0.999653	0.109592	0.0027	0.0202458
Helicobacter_pylori	AE000511.1	SRP001481	SRR031185	-0.00121156	0	0.0238095	0.995152	0.999826	0.117852	0.003	0.0221903
Helicobacter_pylori	AE000511.1	SRP001481	SRR031186	-0.000942487	0	0	0.993151	0.999826	0.114947	0.0021	0.0181587
Helicobacter_pylori	AE000511.1	SRP001481	SRR031187	-0.00320037	0	0.047619	0.904203	0.994692	-0.02042	0.0046	0.031223
Helicobacter_pylori	AE000511.1	SRP001481	SRR031188	-0.00313234	0	0.047619	0.942799	0.997151	0.0398843	0.0041	0.0258415
Helicobacter_pylori	AE000511.1	SRP001481	SRR031189	-0.00381814	0	0.0714286	0.850266	0.990418	-0.109152	0.0053	0.0306393
Helicobacter_pylori	AE000511.1	SRP001481	SRR031190	-0.00416544	0	0.0714286	0.855787	0.990989	-0.0998142	0.0052	0.0329654
Helicobacter_pylori	AE000511.1	SRP001481	SRR031191	-0.00255309	0	0.047619	0.978915	0.999168	0.0941169	0.0033	0.0223886
Helicobacter_pylori	AE000511.1	SRP001481	SRR031192	-0.00129516	0	0.047619	0.948358	0.998113	0.0483654	0.003	0.057484
Helicobacter_pylori	AE000511.1	SRP001481	SRR031193	-0.0010452	0	0.047619	0.960403	0.998836	0.0665744	0.0024	0.0481139
Helicobacter_pylori	AE000511.1	SRP001481	SRR031194	-0.00125942	0	0.047619	0.956435	0.998423	0.0606007	0.003	0.0542245
Helicobacter_pylori	AE000511.1	SRP001481	SRR031195	-0.00126055	0	0.047619	0.994344	0.999826	0.116678	0.0025	0.0571386
Helicobacter_pylori	AE000511.1	SRP001481	SRR031196	-0.00093264	0	0.047619	0.995475	0.999884	0.118319	0.0021	0.0480422
Helicobacter_pylori	AE000511.1	SRP001481	SRR031197	-0.00228	0	0.0952381	0.827652	0.980257	-0.148043	0.0095	0.214821
Helicobacter_pylori	AE000511.1	SRP001481	SRR031198	-0.00228125	0	0.0952381	0.830485	0.982926	-0.143111	0.0084	0.205721
Helicobacter_pylori	AE000511.1	SRP001481	SRR031199	-0.00224365	0	0.142857	0.835153	0.980894	-0.135025	0.0096	0.197801
Helicobacter_pylori	AE000511.1	SRP001481	SRR031200	-0.00233691	0	0.0952381	0.835884	0.982629	-0.133763	0.0088	0.211662
Helicobacter_pylori	AE000511.1	SRP001481	SRR031201	-0.00167262	0	0.0714286	0.972306	0.998344	0.0843447	0.005	0.180598
Helicobacter_pylori	AE000511.1	SRP001481	SRR031202	-0.00285379	0	0.285714	0.751972	0.961571	-0.286387	0.0128	0.17836
Helicobacter_pylori	AE000511.1	SRP001481	SRR031203	-0.00260549	0	0.309524	0.786484	0.965042	-0.221648	0.0136	0.168035
Helicobacter_pylori	AE000511.1	SRP001481	SRR031204	-0.00306292	0	0.285714	0.753355	0.958794	-0.283737	0.0139	0.158837
Helicobacter_pylori	AE000511.1	SRP001481	SRR031205	-0.00322414	0	0.309524	0.750756	0.955865	-0.288723	0.0147	0.173665
Helicobacter_pylori	AE000511.1	SRP001481	SRR031206	-0.00237786	0	0.238095	0.836722	0.986238	-0.132317	0.007	0.149602
Helicobacter_pylori	AE000511.1	SRP001481	SRR031207	-0.00102524	0	0	0.990817	0.999667	0.111552	0.003	0.0549873
Helicobacter_pylori	AE000511.1	SRP001481	SRR031208	-0.00102893	0	0.0714286	0.991403	0.999667	0.112406	0.0032	0.0566141
Helicobacter_pylori	AE000511.1	SRP001481	SRR031209	-0.000914967	0	0	0.99073	0.999667	0.111425	0.003	0.0523188
Helicobacter_pylori	AE000511.1	SRP001481	SRR031210	-0.000939298	0	0.0238095	0.99077	0.999667	0.111485	0.003	0.0566407
Helicobacter_pylori	AE000511.1	SRP001481	SRR031211	-0.000893802	0	0	0.991583	0.999776	0.112667	0.0022	0.050622
Helicobacter_pylori	AE000511.1	SRP001481	SRR031212	-0.0013982	0	0.0952381	0.849598	0.992421	-0.110285	0.0042	0.0333135
Helicobacter_pylori	AE000511.1	SRP001481	SRR031213	-0.00223497	0	0.0714286	0.903794	0.995856	-0.0210712	0.0036	0.0334755
Helicobacter_pylori	AE000511.1	SRP001481	SRR031214	-0.00217198	0	0.0714286	0.903347	0.995907	-0.0217857	0.0035	0.0313698
Helicobacter_pylori	AE000511.1	SRP001481	SRR031215	-0.00235953	0	0.0714286	0.83608	0.991655	-0.133426	0.0042	0.0344997
Helicobacter_pylori	AE000511.1	SRP001481	SRR031216	-0.00178424	0	0.0238095	0.9936	0.999798	0.115599	0.0026	0.0303661
Helicobacter_pylori	AE000511.1	SRP001481	SRR031217	-0.00108357	0	0.0238095	0.995424	0.999826	0.118245	0.0031	0.0617909
Helicobacter_pylori	AE000511.1	SRP001481	SRR031218	-0.000982532	0	0.0238095	0.995462	0.999826	0.118301	0.0032	0.0569703
Helicobacter_pylori	AE000511.1	SRP001481	SRR031219	-0.000955589	0	0.0714286	0.995787	0.999826	0.118772	0.0034	0.0586747
Helicobacter_pylori	AE000511.1	SRP001481	SRR031220	-0.00101246	0	0.047619	0.989852	0.999559	0.110147	0.0036	0.0633141
Helicobacter_pylori	AE000511.1	SRP001481	SRR031221	-0.000964304	0	0	0.994731	0.999826	0.117241	0.0027	0.0557975
Helicobacter_pylori	AE000511.1	SRP001481	SRR031222	-0.0017181	0	0.119048	0.924339	0.995798	0.0113562	0.0046	0.0491641
Helicobacter_pylori	AE000511.1	SRP001481	SRR031223	-0.00202967	0	0.119048	0.879069	0.993311	-0.0610893	0.0046	0.0485629
Helicobacter_pylori	AE000511.1	SRP001481	SRR031224	-0.00176618	0	0.119048	0.873779	0.992804	-0.0697975	0.0047	0.0483676
Helicobacter_pylori	AE000511.1	SRP001481	SRR031225	-0.00195809	0	0.119048	0.874249	0.99258	-0.0690213	0.0049	0.0510521
Helicobacter_pylori	AE000511.1	SRP001481	SRR031226	-0.00149535	0	0.047619	0.988011	0.999487	0.107461	0.0036	0.0422362
Helicobacter_pylori	AE000511.1	SRP001481	SRR031276	-0.00223398	0	0.119048	0.873936	0.991322	-0.0695378	0.0057	0.0385808
Helicobacter_pylori	AE000511.1	SRP001481	SRR031277	-0.00180587	0	0.0714286	0.958486	0.997787	0.0636913	0.0044	0.0306528
Helicobacter_pylori	AE000511.1	SRP001481	SRR031278	-0.00145696	0	0.0238095	0.992041	0.999696	0.113334	0.0032	0.0219102
Helicobacter_pylori	AE000511.1	SRP001481	SRR031279	-0.00103786	0	0	0.994439	0.999826	0.116817	0.0026	0.0169143
Helicobacter_pylori	AE000511.1	SRP001481	SRR031280	-0.00395712	0	0.0952381	0.8845	0.993065	-0.0522046	0.005	0.0321772
Helicobacter_pylori	AE000511.1	SRP001481	SRR031281	-0.00341266	0	0.047619	0.943367	0.997382	0.0407527	0.0038	0.0254408
Helicobacter_pylori	AE000511.1	SRP001481	SRR031282	-0.00142312	0	0.047619	0.98531	0.999501	0.103511	0.0028	0.0579013
Helicobacter_pylori	AE000511.1	SRP001481	SRR031283	-0.00117216	0	0.047619	0.975672	0.999176	0.0893305	0.0028	0.0503567
Helicobacter_pylori	AE000511.1	SRP001481	SRR031284	-0.00219235	0	0.0952381	0.844555	0.983454	-0.118875	0.0088	0.214858
Helicobacter_pylori	AE000511.1	SRP001481	SRR031285	-0.0024319	0	0.119048	0.798695	0.975456	-0.199421	0.0101	0.2142
Helicobacter_pylori	AE000511.1	SRP001481	SRR031286	-0.00275347	0	0.285714	0.787378	0.968716	-0.220009	0.0122	0.178593
Helicobacter_pylori	AE000511.1	SRP001481	SRR031287	-0.00283163	0	0.309524	0.745093	0.951352	-0.299646	0.0158	0.175433
Helicobacter_pylori	AE000511.1	SRP001481	SRR031288	-0.00101514	0	0.0238095	0.990547	0.999667	0.111159	0.0029	0.0559157
Helicobacter_pylori	AE000511.1	SRP001481	SRR031289	-0.00105875	0	0.0952381	0.992546	0.999667	0.114068	0.0037	0.0579387
Helicobacter_pylori	AE000511.1	SRP001481	SRR031290	-0.00170361	0	0.0952381	0.901361	0.995755	-0.0249608	0.0036	0.0348913
Helicobacter_pylori	AE000511.1	SRP001481	SRR031291	-0.00236857	0	0.0952381	0.864101	0.993181	-0.0858653	0.0042	0.0361553
Helicobacter_pylori	AE000511.1	SRP001481	SRR031292	-0.000991385	0	0.047619	0.991821	0.999653	0.113014	0.0035	0.0636557
Helicobacter_pylori	AE000511.1	SRP001481	SRR031293	-0.00105125	0	0.047619	0.992232	0.999675	0.113611	0.0035	0.0618133
Helicobacter_pylori	AE000511.1	SRP001481	SRR031294	-0.00186831	0	0.166667	0.825119	0.988813	-0.152464	0.0053	0.0539779
Helicobacter_pylori	AE000511.1	SRP001481	SRR031295	-0.00182108	0	0.0952381	0.890644	0.993491	-0.0422172	0.0049	0.0512403
Helicobacter_pylori	AE000511.1	SRP001481	SRR034162	-0.00111543	0	0	0.981524	0.999826	0.0979579	0.0008	0.088586
Helicobacter_pylori	AE000511.1	SRP001481	SRR034163	-0.00103015	0	0.0238095	0.994528	0.999826	0.116946	0.0026	0.0671919
Helicobacter_pylori	AE000511.1	SRP001481	SRR034165	-0.00113531	0	0.0714286	0.982918	0.999291	0.100005	0.0034	0.0752094
Helicobacter_pylori	AE000511.1	SRP001481	SRR034166	-0.00223689	0	0	1	1	0.124862	0.0004	0.0594345
Helicobacter_pylori	AE000511.1	SRP001481	SRR034167	-0.00207189	0	0.0952381	0.888348	0.998011	-0.0459418	0.0015	0.0499509
Helicobacter_pylori	AE000511.1	SRP001481	SRR034168	-0.00260097	0	0.0714286	0.797551	0.996413	-0.201489	0.0015	0.0526393
Helicobacter_pylori	AE000511.1	SRP001481	SRR034169	-0.00133065	0	0.047619	0.987959	0.999711	0.107385	0.002	0.0640939
Helicobacter_pylori	AE000511.1	SRP001481	SRR034170	-0.00135031	0	0.047619	0.988124	0.999711	0.107625	0.002	0.067355
Helicobacter_pylori	AE000511.1	SRP001481	SRR034171	-0.00117982	0	0	0.983425	0.999826	0.10075	0.0009	0.0690963
Helicobacter_pylori	AE000511.1	SRP001481	SRR034172	-0.00359107	0	0.0714286	0.896047	0.996196	-0.0334909	0.003	0.0412418
Helicobacter_pylori	AE000511.1	SRP001481	SRR034173	-0.00429366	0	0.0714286	0.870713	0.99373	-0.0748691	0.004	0.042464
Helicobacter_pylori	AE000511.1	SRP001481	SRR034174	-0.00326054	0	0	0.997561	0.999986	0.121339	0.0005	0.0454063
Helicobacter_pylori	AE000511.1	SRP001481	SRR034175	-0.0021614	0	0	0.990692	0.999819	0.111371	0.0016	0.247141
Helicobacter_pylori	AE000511.1	SRP001481	SRR034176	-0.00211542	0	0.119048	0.894746	0.99125	-0.0355878	0.0069	0.337405
Helicobacter_pylori	AE000511.1	SRP001481	SRR034177	-0.00207095	0	0.0952381	0.908562	0.993412	-0.0134816	0.006	0.343519
Helicobacter_pylori	AE000511.1	SRP001481	SRR034178	-0.0031033	0	0.0714286	0.833578	0.993434	-0.137749	0.0033	0.22984
Helicobacter_pylori	AE000511.1	SRP001481	SRR034179	-0.00349914	0	0.190476	0.800752	0.983895	-0.195711	0.0067	0.26095
Helicobacter_pylori	AE000511.1	SRP001481	SRR034180	-0.00249079	0	0.261905	0.793727	0.980453	-0.208423	0.0079	0.269848
Helicobacter_pylori	AE000511.1	SRP001481	SRR034181	-0.00133467	0	0.0238095	0.994262	0.999819	0.11656	0.0026	0.0248381
Helicobacter_pylori	AE000511.1	SRP001481	SRR034182	-0.00136447	0	0	0.990566	0.999653	0.111187	0.0031	0.0247708
Helicobacter_pylori	AE000511.1	SRP001481	SRR034183	-0.000786795	0	0	0.953789	0.999819	0.0566046	0.0003	0.0263158
Helicobacter_pylori	AE000511.1	SRP001481	SRR034185	-0.00208418	0	0.0952381	0.957941	0.998062	0.0628708	0.0038	0.0416383
Helicobacter_pylori	AE000511.1	SRP001481	SRR034186	-0.002255	0	0.0952381	0.872617	0.992992	-0.0717169	0.0046	0.0445879
Helicobacter_pylori	AE000511.1	SRP001481	SRR034187	-0.00191133	0	0	1	1	0.124862	0.0004	0.0427526
Helicobacter_pylori	AE000511.1	SRP001481	SRR034193	-0.00104948	0	0	0.986588	0.999819	0.105382	0.0011	0.0704253
Helicobacter_pylori	AE000511.1	SRP001481	SRR034195	-0.00123227	0	0.047619	0.983832	0.99932	0.101346	0.0035	0.0777521
Helicobacter_pylori	AE000511.1	SRP001481	SRR034197	-0.00106496	0	0.047619	0.99506	0.999819	0.117718	0.003	0.0773911
Helicobacter_pylori	AE000511.1	SRP001481	SRR034198	-0.00198189	0	0.047619	0.900582	0.99864	-0.0262088	0.0011	0.081019
Helicobacter_pylori	AE000511.1	SRP001481	SRR034199	-0.00208038	0	0.0952381	0.834921	0.990223	-0.135427	0.0049	0.073163
Helicobacter_pylori	AE000511.1	SRP001481	SRR034201	-0.00151505	0	0.119048	0.845281	0.990432	-0.117635	0.0051	0.0733104
Helicobacter_pylori	AE000511.1	SRP001481	SRR034204	-0.00147126	0	0.047619	0.981118	0.999458	0.0973604	0.0024	0.0581694
Helicobacter_pylori	AE000511.1	SRP001481	SRR034207	-0.00541424	0	0.119048	0.815348	0.982268	-0.169651	0.008	0.027114
Helicobacter_pylori	AE000511.1	SRP001481	SRR034208	-0.000932535	0	0	0.98666	0.999819	0.105486	0.0011	0.0217084
Helicobacter_pylori	AE000511.1	SRP001481	SRR034209	-0.00234304	0	0.0952381	0.948874	0.997997	0.0491507	0.0032	0.035818
Frankia_sp._CcI3	CP000249.1	SRP007469	SRR308710	0.969786	1	1	0.857527	0.0839391	0.00185295	0.9231	0.795707
Frankia_sp._CcI3	CP000249.1	SRP007469	SRR308711	0.963548	1	1	0.854774	0.0348765	-0.00278629	0.9541	0.857699
Frankia_sp._CcI3	CP000249.1	SRP007469	SRR308712	0.547089	0.05	0.934783	0.836815	0.683963	-0.0334203	0.2781	0.745488
Escherichia_coli_K-12_MG1665	U00096.2	SRP011371	SRR441579	0.947781	0.575	0.160714	0.916988	0.957277	0.0250868	0.0509	0.799801
Escherichia_coli_K-12_MG1665	U00096.2	SRP011371	SRR441580	0.822581	0.95	0.553571	0.946866	0.826311	0.0713454	0.323	0.985911
Escherichia_coli_K-12_MG1665	U00096.2	SRP011371	SRR441581	0.965341	0.925	0.446429	0.946464	0.8986	0.0707317	0.1872	0.958287
Escherichia_coli_K-12_MG1665	U00096.2	SRP011371	SRR441582	0.850341	0.925	0.571429	0.93993	0.816889	0.0607373	0.3012	0.943348
Escherichia_coli_K-12_MG1665	U00096.2	SRP011371	SRR441583	0.89761	1	0.821429	0.937702	0.622475	0.0573143	0.5988	0.958544
Escherichia_coli_K-12_MG1665	U00096.2	SRP011371	SRR441584	0.851465	0.925	0.571429	0.938139	0.788036	0.0579867	0.3386	0.920104
Escherichia_coli_K-12_MG1665	U00096.2	SRP011371	SRR441585	0.811417	0.975	0.839286	0.930228	0.574734	0.0457685	0.6023	0.94517
Escherichia_coli_K-12_MG1665	U00096.2	SRP011371	SRR441586	0.807112	0.85	0.321429	0.929027	0.899115	0.0439044	0.1405	0.961367
Escherichia_coli_K-12_MG1665	U00096.2	SRP011371	SRR441587	0.985303	0.675	0.0357143	0.948795	0.978501	0.0742802	0.0415	0.702811
Escherichia_coli_ETEC_E24377A	CP000800.1	SRP008239	SRR345260	0.338195	1	0.7	0.929387	0.526149	0.0614693	0.734	0.965564
Escherichia_coli_ETEC_E24377A	CP000800.1	SRP008239	SRR345261	0.718953	1	0.7	0.922182	0.532362	0.0502418	0.6573	0.980023
Clostridium_difficile_630	AM180355	ermB	ermB_Tag17_455305	0.0191131	0.825	0.365854	0.91065	0.858671	0.0703411	NA	NA
Clostridium_difficile_630	AM180355	ermB	ermB_Tag18_455308	0.0584918	0.85	0.634146	0.921698	0.882687	0.0877389	NA	NA
Clostridium_difficile_630	AM180355	ermB	ermB_Tag19_455311	0.0394431	0.85	0.609756	0.922781	0.871771	0.0894324	NA	NA
Clostridium_difficile_630	AM180355	spo0A	spo0A_Tag20_455314	0.0251603	0.825	0.512195	0.922018	0.877334	0.0882396	NA	NA
Clostridium_difficile_630	AM180355	spo0A	spo0A_Tag21_455317	0.0439845	0.8	0.463415	0.923389	0.881366	0.0903827	NA	NA
Clostridium_difficile_630	AM180355	spo0A	spo0A_Tag22_455320	0.0489554	0.8	0.487805	0.923561	0.890985	0.0906511	NA	NA
Clostridium_beijerinckii_NCIMB_8052	CP000721.1	SRP008141	SRR342473	0.816725	0.75	0.659091	0.906323	0.971212	0.155443	0.0572	0.994
Clostridium_beijerinckii_NCIMB_8052	CP000721.1	SRP008141	SRR342474	0.813354	0.325	0.545455	0.900263	0.970564	0.145765	0.055	0.995869
Clostridium_beijerinckii_NCIMB_8052	CP000721.1	SRP008141	SRR342475	0.799384	0.325	0.568182	0.90638	0.963968	0.155534	0.0717	0.994675
Clostridium_beijerinckii_NCIMB_8052	CP000721.1	SRP008141	SRR342476	0.809851	0.25	0.477273	0.900687	0.965009	0.146444	0.0656	0.992817
Clostridium_beijerinckii_NCIMB_8052	CP000721.1	SRP008141	SRR342477	0.759927	0.45	0.318182	0.916071	0.971229	0.170878	0.0638	0.994761
Clostridium_beijerinckii_NCIMB_8052	CP000721.1	SRP008141	SRR342478	0.847742	0.625	0.545455	0.921112	0.955646	0.178795	0.1047	0.9946
Citrobacter_rodentium	FN543502.1	ERP000493	ERR026449	0.0738289	0.95	0.641509	0.937478	0.874399	0.0736715	0.2194	0.84655
Citrobacter_rodentium	FN543502.1	ERP000493	ERR026450	0.169818	1	0.773585	0.933804	0.791877	0.0680065	0.3433	0.866649
Chlamydophila_pneumoniae_CWL029	AE001363.1	SRP004041	SRR071140	-0.0022695	0	0	0.932383	0.998595	0.0446632	0.002	0.0207114
Chlamydophila_pneumoniae_CWL029	AE001363.1	SRP004041	SRR071141	-0.00639833	0	0.047619	0.907881	0.99631	0.00624364	0.0038	0.0197542
Chlamydophila_pneumoniae_CWL029	AE001363.1	SRP004041	SRR071142	-0.00366331	0	0.047619	0.925926	0.997681	0.0346375	0.003	0.0119608
Chlamydophila_pneumoniae_CWL029	AE001363.1	SRP004041	SRR071143	-0.00262295	0	0.0714286	0.925971	0.997419	0.0347075	0.0033	0.00911749
Chlamydophila_pneumoniae_CWL029	AE001363.1	SRP004041	SRR071144	-0.0037116	0	0.0714286	0.893529	0.995015	-0.0167455	0.0045	0.0236348
Chlamydophila_pneumoniae_CWL029	AE001363.1	SRP004041	SRR071145	-0.00240168	0	0.0714286	0.939642	0.998629	0.0558524	0.0022	0.00211208
Chlamydophila_pneumoniae_CWL029	AE001363.1	SRP004041	SRR071146	-0.00115128	0	0	NA	1	NA	0	0.00166359
Chlamydophila_pneumoniae_CWL029	AE001363.1	SRP004041	SRR071147	-0.00287153	0	0	0.831448	0.998739	-0.120633	0.0007	0.000930195
Chlamydophila_pneumoniae_CWL029	AE001363.1	SRP004041	SRR071148	-0.00135101	0	0	0.798982	0.999331	-0.178096	0.0003	0.000561594
Chlamydophila_pneumoniae_CWL029	AE001363.1	SRP004041	SRR071149	-0.00123496	0	0	NA	1	NA	0	0.000546584
Chlamydophila_pneumoniae_CWL029	AE001363.1	SRP004041	SRR071150	-0.00640495	0	0.0714286	0.883501	0.993026	-0.0330281	0.0057	0.0473008
Chlamydophila_pneumoniae_CWL029	AE001363.1	SRP004041	SRR071151	-0.00391931	0	0.0238095	0.905596	0.997901	0.00260786	0.0021	0.0324092
Chlamydophila_pneumoniae_CWL029	AE001363.1	SRP004041	SRR071152	-0.00929495	0	0.047619	0.884007	0.995777	-0.0322008	0.0035	0.0216239
Chlamydophila_pneumoniae_CWL029	AE001363.1	SRP004041	SRR071153	-0.00735932	0	0.047619	0.878721	0.995794	-0.0408536	0.0033	0.013588
Chlamydophila_pneumoniae_CWL029	AE001363.1	SRP004041	SRR071154	-0.00798225	0	0.047619	0.900698	0.995904	-0.00521653	0.004	0.0121955
Chlamydophila_pneumoniae_CWL029	AE001363.1	SRP004041	SRR071155	-0.00279753	0	0.0714286	0.946547	0.998028	0.0664154	0.0035	0.00804319
Chlamydophila_pneumoniae_CWL029	AE001363.1	SRP004041	SRR071156	-0.002757	0	0	0.828205	0.999433	-0.126271	0.0003	0.00604982
Chlamydophila_pneumoniae_CWL029	AE001363.1	SRP004041	SRR071157	-0.00384263	0	0.0714286	0.860498	0.994973	-0.0710877	0.0035	0.00519652
Chlamydophila_pneumoniae_CWL029	AE001363.1	SRP004041	SRR071158	-0.00358963	0	0	0.94613	0.999128	0.0657787	0.0016	0.00312669
Chlamydophila_pneumoniae_CWL029	AE001363.1	SRP004041	SRR071159	-0.00310215	0	0.0238095	0.941357	0.998866	0.0584821	0.0019	0.00294746
Burkholderia_glumae_BGR1	CP001504.2	SRP011470	SRR445017	0.885038	0.222222	0.777778	0.884399	0.841086	0.0748251	0.2204	0.984974
Burkholderia_glumae_BGR1	CP001504.2	SRP011470	SRR445018	0.883906	0.777778	0.777778	0.886403	0.811078	0.0780913	0.2666	0.981499
Burkholderia_glumae_BGR1	CP001504.2	SRP011470	SRR445019	0.880804	0.555556	0.777778	0.888803	0.842524	0.0819924	0.227	0.982979
Burkholderia_glumae_BGR1	CP001504.2	SRP011470	SRR445020	0.880855	0.333333	0.666667	0.891907	0.912141	0.0870222	0.1303	0.985837
Burkholderia_glumae_BGR1	CP001504.2	SRP011470	SRR445021	0.876832	0.222222	0.666667	0.890992	0.921399	0.0855413	0.1156	0.987362
Burkholderia_glumae_BGR1	CP001504.2	SRP011470	SRR445022	0.878932	0.333333	0.555556	0.894771	0.913262	0.0916465	0.1321	0.988541
Burkholderia_glumae_BGR1	CP001503.2	SRP011470	SRR445017	0.853847	0.975	0.9	0.909234	0.730781	0.109961	0.4671	0.984974
Burkholderia_glumae_BGR1	CP001503.2	SRP011470	SRR445018	0.859699	0.975	0.8	0.90948	0.707925	0.11035	0.5082	0.981499
Burkholderia_glumae_BGR1	CP001503.2	SRP011470	SRR445019	0.853904	0.975	0.86	0.91325	0.746209	0.116318	0.4607	0.982979
Burkholderia_glumae_BGR1	CP001503.2	SRP011470	SRR445020	0.86144	0.8	0.56	0.910499	0.86729	0.111966	0.2335	0.985837
Burkholderia_glumae_BGR1	CP001503.2	SRP011470	SRR445021	0.858024	0.9	0.68	0.905913	0.861505	0.104681	0.2318	0.987362
Burkholderia_glumae_BGR1	CP001503.2	SRP011470	SRR445022	0.85919	0.925	0.64	0.910243	0.847111	0.11156	0.2683	0.988541
Bacillus_cereus_ATCC_10987	AE016877.1	ERR031734	ERR031734	0.797656	0.85	0.354167	0.930907	0.961027	0.134683	0.0858	0.977043
Bacillus_cereus_ATCC_10987	AE017194.1	ERR031734	ERR031734	0.804634	0.85	0.391304	0.94104	0.956563	0.112423	0.0954	0.979269
Bacillus_anthracis	AE017225.1	GSE13543	GSM343458_1	0.613039	0.975	0.603774	0.922404	0.818117	0.112026	0.3434	0.228815
Bacillus_anthracis	AE017225.1	GSE13543	GSM343459_2A	0.726822	0.8	0.150943	0.933387	0.948882	0.129102	0.1124	0.0987905
Bacillus_anthracis	AE017225.1	GSE13543	GSM343459_2B	0.71571	0.9	0.169811	0.935685	0.91883	0.13265	0.1849	0.0987354
Bacillus_anthracis	AE017225.1	GSE13543	GSM343460_5	0.608897	1	0.415094	0.925886	0.788203	0.117462	0.4187	0.318043
Bacillus_anthracis	AE017225.1	GSE13543	GSM343461_6A	0.606192	0.875	0.264151	0.928148	0.875779	0.120981	0.2533	0.139546
Bacillus_anthracis	AE017225.1	GSE13543	GSM343461_6B	0.606927	0.875	0.245283	0.928318	0.867862	0.121246	0.2701	0.136869
Bacillus_anthracis	AE017225.1	GSE13543	GSM343462_7	0.761468	0.75	0.188679	0.860212	0.891727	0.0113186	0.1135	0.0308554
Bacillus_anthracis	AE017225.1	GSE13543	GSM343463_8A	0.748846	0.725	0.113208	0.920839	0.946702	0.109576	0.0986	0.0450556
Bacillus_anthracis	AE017225.1	GSE13543	GSM343463_8B	0.712424	0.725	0.132075	0.919226	0.943881	0.107046	0.1018	0.0453815
Bacillus_anthracis	AE017225.1	SRP001274	SRR028684	0.603108	0.75	0.132075	0.926272	0.957792	0.118063	0.0839	0.812177
Bacillus_anthracis	AE017225.1	SRP001274	SRR028685	0.602798	0.75	0.132075	0.927526	0.957842	0.120015	0.0852	0.816811
Bacillus_anthracis	AE017225.1	SRP001274	SRR028686	0.606561	0.75	0.150943	0.928528	0.956863	0.121573	0.0884	0.818612
Bacillus_anthracis	AE017225.1	SRP001274	SRR028687	0.779235	0.725	0.0754717	0.926046	0.966623	0.11771	0.0661	0.824307
Bacillus_anthracis	AE017225.1	SRP001274	SRR028688	0.778508	0.725	0.0754717	0.926442	0.967843	0.118328	0.064	0.82407
Bacillus_anthracis	AE017225.1	SRP001274	SRR028689	0.780284	0.725	0.0754717	0.927188	0.96947	0.119488	0.0614	0.823361
Vibrio_splendidus_LGP32	FM954972.2	SRP021844	SRR836420	-0.00236526	0.65	0.416667	0.885849	0.931142	0.0191728	0.0759	0.931121
Vibrio_splendidus_LGP32	FM954973.2	SRP021844	SRR836420	-0.000534596	0	0	0.883737	0.991207	0.0408203	0.0107	0.931121
